# Supplementary material for: PAtCh-Cap: input strategy for improving analysis of ChIP-exo data sets and beyond
Source: PubMed Central journal article supplement — Nucleic Acids Res. 2016 Aug 22;44(21):e159. doi: 10.1093/nar/gkw741 (PMC5137431; doi:10.1093/nar/gkw741), 2016-08-22
Supplement: supp_gkw741_nar-01184-met-k-2016-File006.pdf [file supp_gkw741_nar-01184-met-k-2016-File006.pdf]

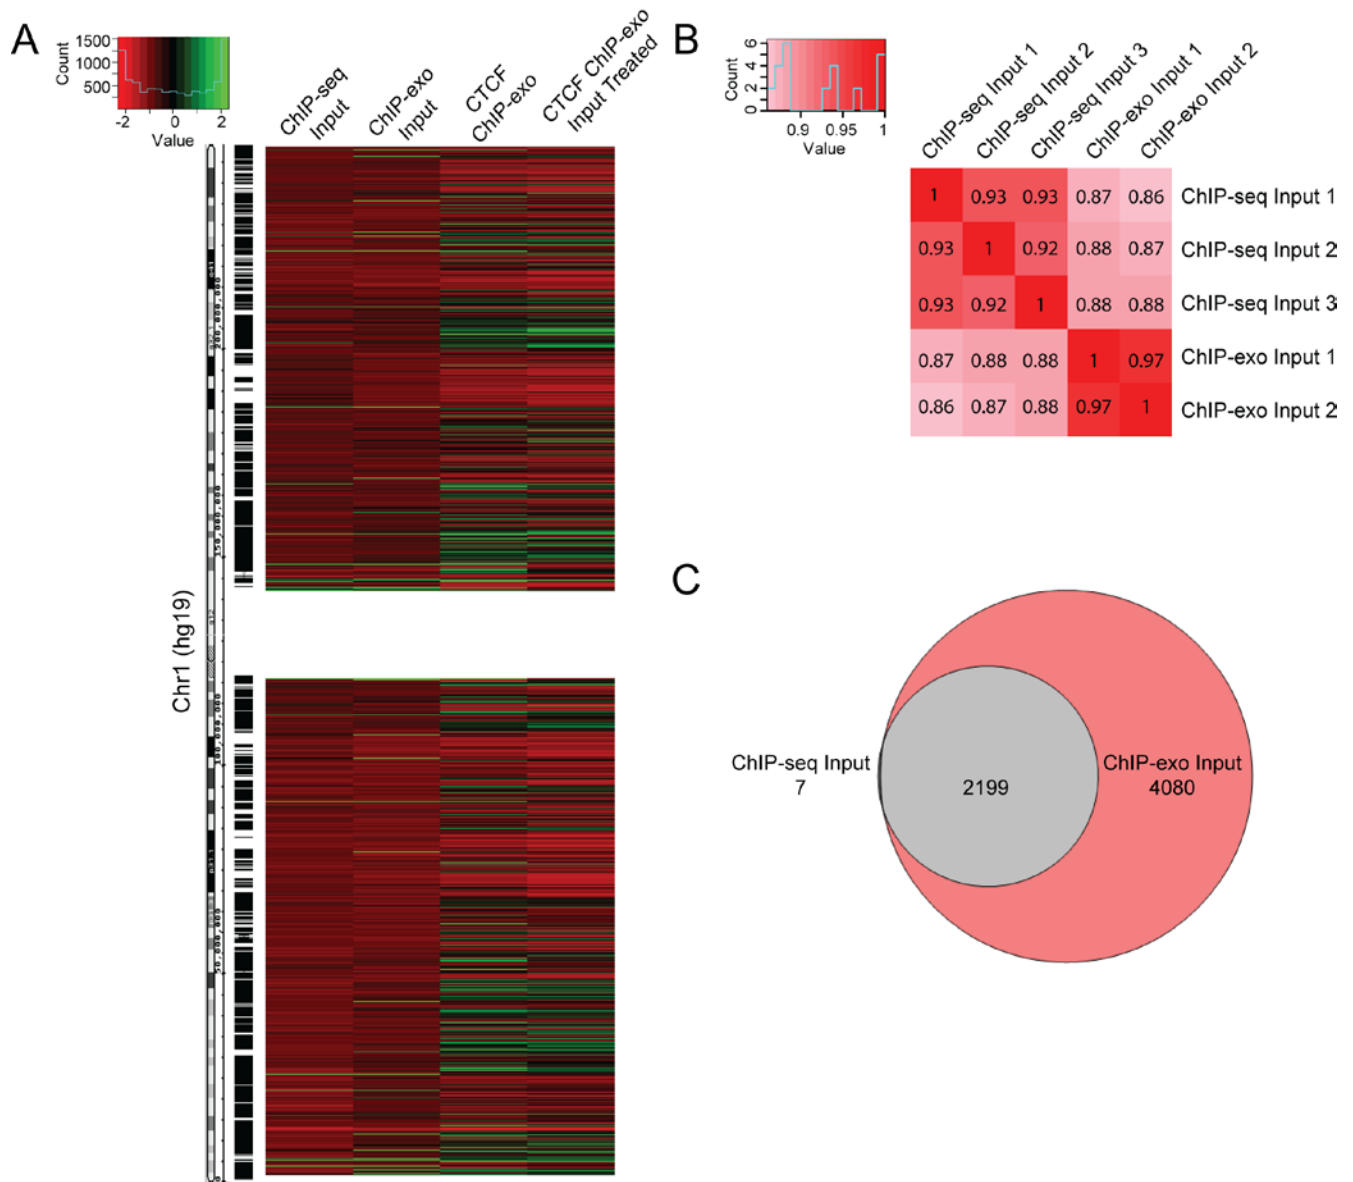

**Supplementary Figure S1.** Technique specific removal of false positive peaks in ChIP-exo data. **(A)** Color-coded heat map enrichment profiles visualized within the Integrated Genome Browser (IGB) for the standard ChIP-seq input, the bead-bound ChIP-exo input and the ChIP-exo profiles without and with input treatment mapped onto chromosome 1. **(B)** Genome-wide correlations (1,000 bp window) for standard ChIP-seq inputs compared to the bead-bound ChIP-exo inputs in HeLa cells. **(C)** Venn diagram showing the intersect of peaks (gray) within the standard ChIP-seq input (not observable) and the ChIP-exo input (red) generated by the PAtCh-Cap method. Together, these data indicate that while a significant number of false positive peaks are shared between the standard ChIP-seq input and the bead-bound ChIP-exo input, there a significant number of additional false positive peaks that are unique to the ChIP-exo process. Use of the ChIP-exo input generated by PAtCh-Cap significantly removes these artifacts in the CTCF ChIP-exo data as demonstrated by the substantial reduction in green loci, particularly for pericentromeric regions in (A).

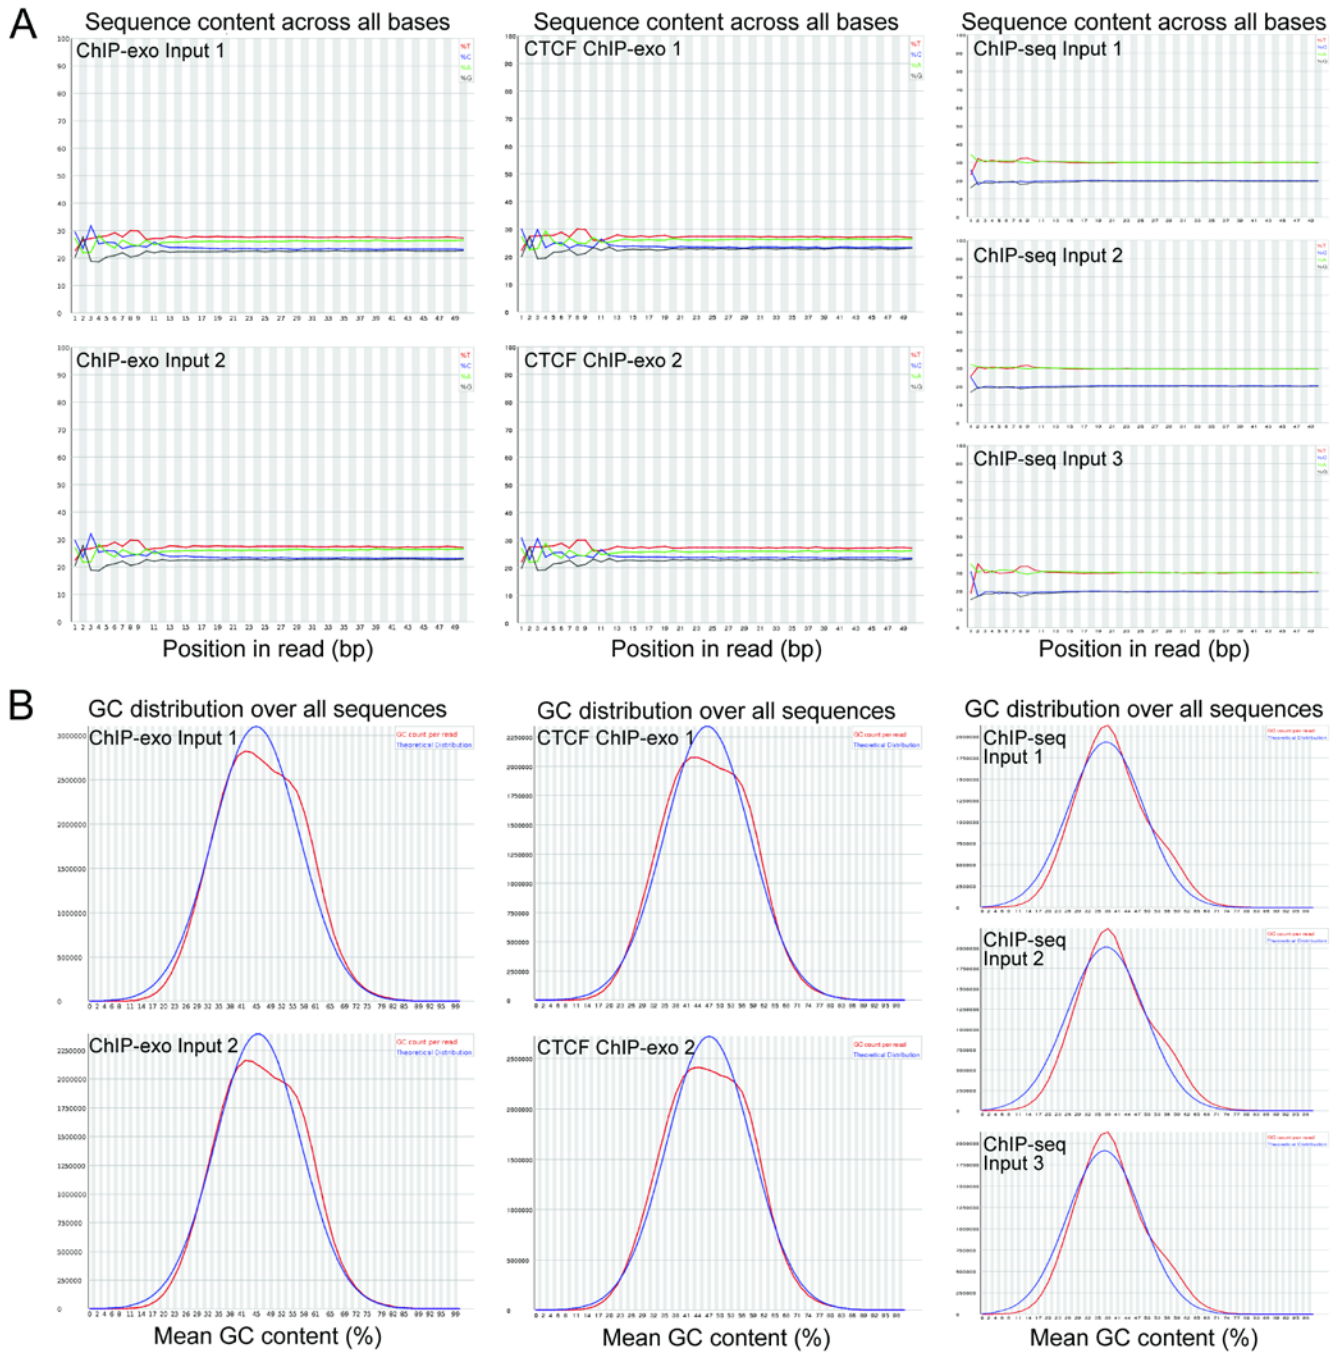

**Supplementary Figure S2.** (A) FastQC plots of nucleotide frequency as a function of base position for the ChIP-exo input, CTCF ChIP-exo, and ChIP-seq input replicates. The four colors represent the bases A (green), T (red), G (black) or C (blue). (B) FastQC plots showing that the GC count per read (red) for each ChIP-exo input, CTCF ChIP-exo, and ChIP-seq input data set relative to the theoretical distribution (blue).

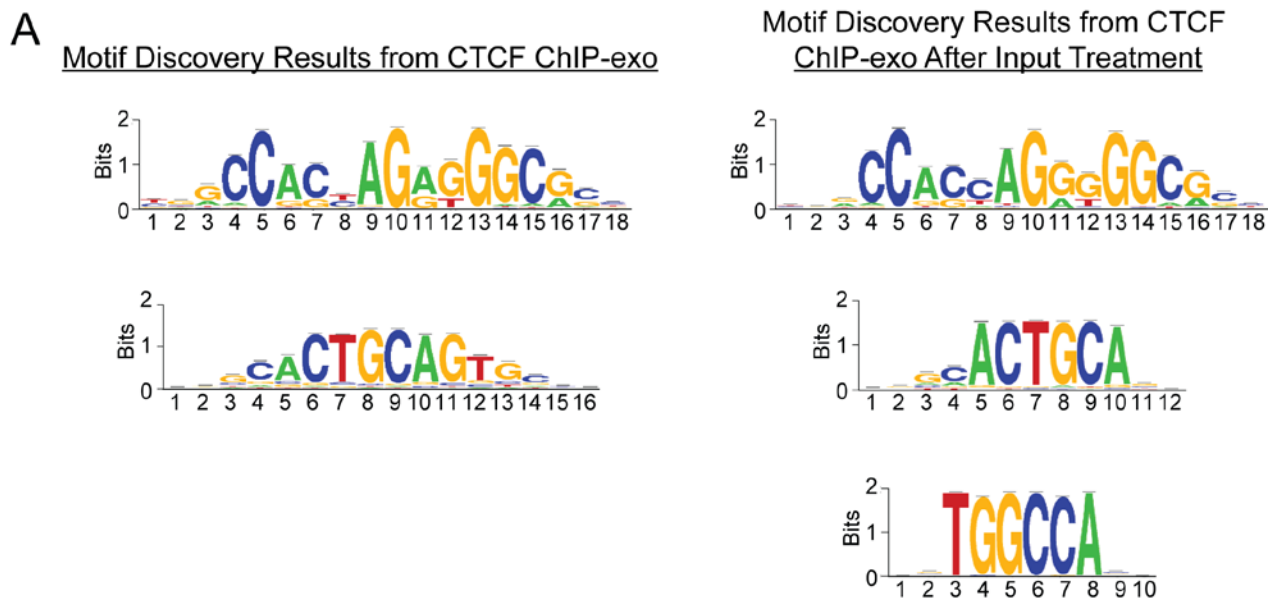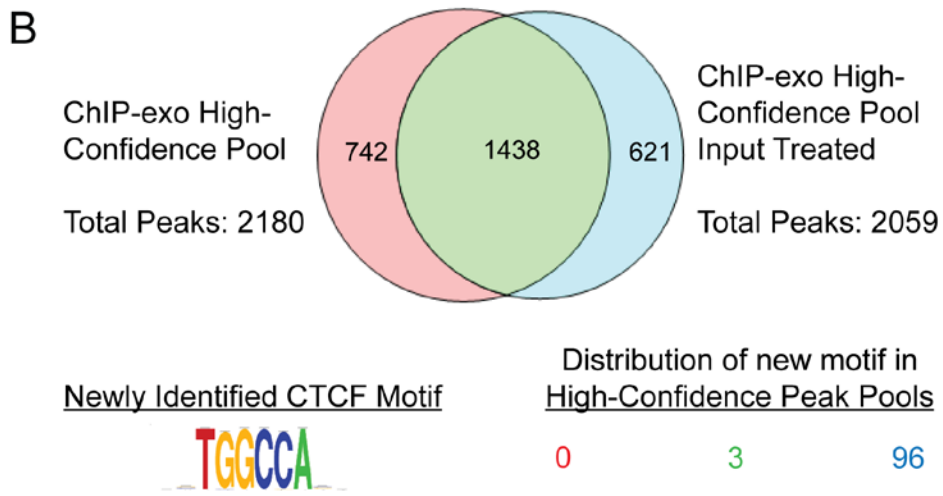

**Supplementary Figure S3.** (A) Results for the *de novo* motif search analysis performed by RSAT on the high-confidence CTCF peaks identified from the ChIP-exo data without and with input treatment (refer to Figure 2A). The newly identified motif is only observed from the *de novo* search conducted on the input treated high-confidence pool. (B) Venn diagram from Figure 2B showing the overlap of high-confidence peaks identified from data sets with and without input treatment (top). Distribution analysis of the newly identified CTCF motif within each of these pools (color coded numbers; bottom) clearly shows that this sequence is found nearly exclusively within the population of high-confidence peaks that were only identified after input treatment (blue).

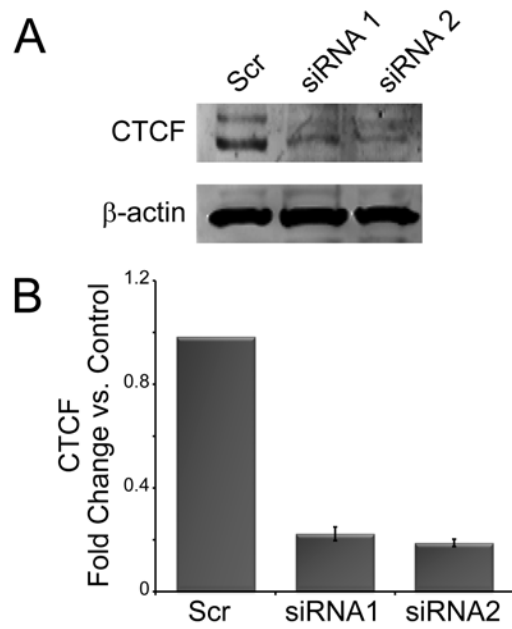

**Supplementary Figure S4.** (A) Representative immunoblot indicating CTCF protein depletion after HeLa cells were treated with two different siRNAs relative to a scrambled siRNA (Scr) control. (B) Sufficient CTCF depletion at the mRNA level in HeLa cells was further confirmed by qRT-PCR. mRNA levels are represented as the fold  $C_T$  change relative to *HPRT1* and a scrambled siRNA (normalized to 1).

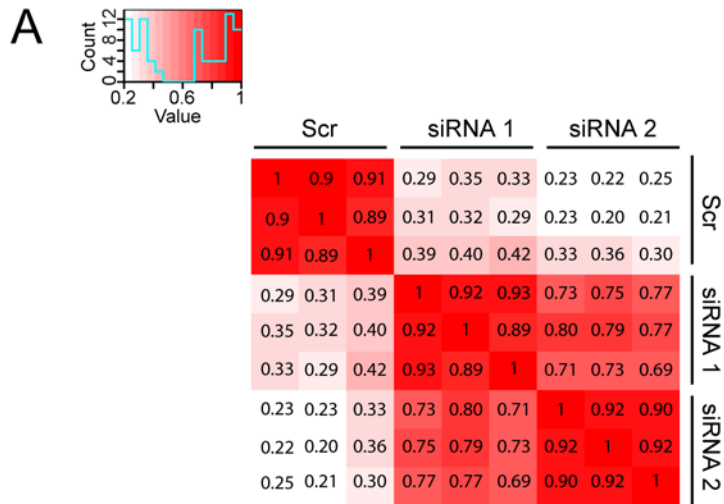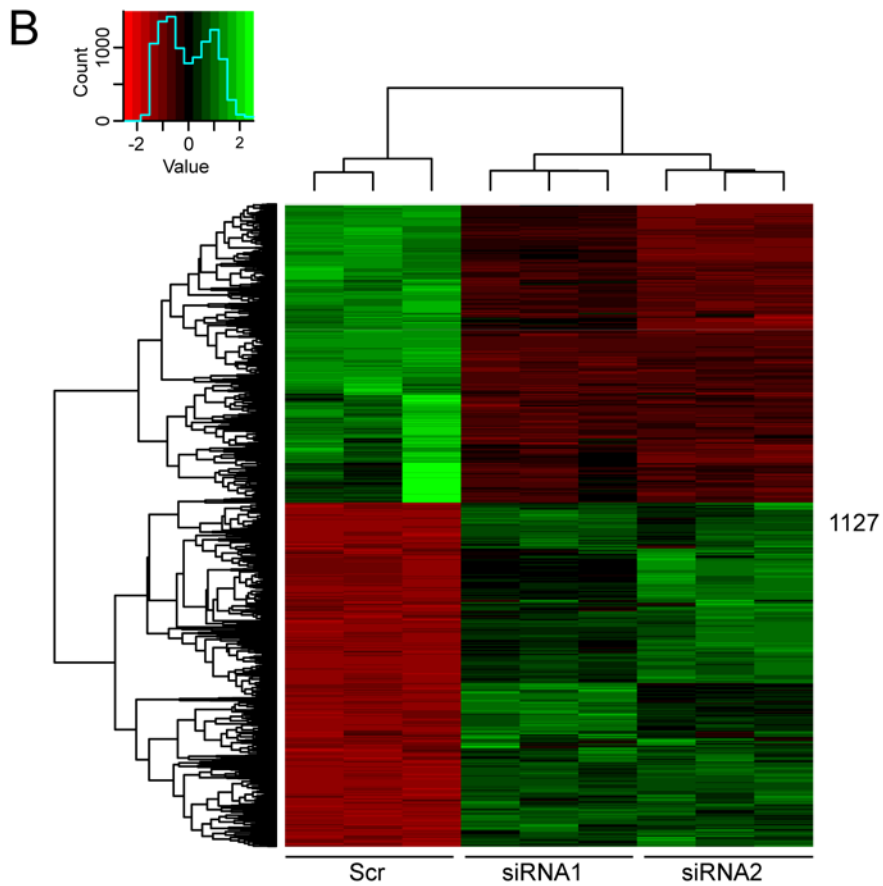

**Supplementary Figure S5. (A)** Genome-wide correlations (1,000 bp window) of the RNA-seq data acquired for each of the scrambled and CTCF siRNA replicates. **(B)** Comprehensive heat map from the RNA-seq data depicting gene transcripts exhibiting a two-fold up- (green) or down-regulation (red) after CTCF depletion relative to the scrambled siRNA control ( $p$ -value cut-off of 0.05).

**Supplementary Table S1.** Incidence of CTCF motif within  $\pm 1000$  bps of regulated gene promoter TSS

|                                                                        | CTCF ChIP-exo | CTCF ChIP-exo Input Treated |
|------------------------------------------------------------------------|---------------|-----------------------------|
| Total genes altered after CTCF depletion (from RNA-seq)                | 1127          |                             |
| Number of ChIP-exo peaks intersected with above altered genes          | 771           | 448                         |
| Number of intersected peaks containing core CTCF motif within promoter | 398           | 396                         |
| % CTCF motif                                                           | 52%           | 88%                         |
